# Supplementary material for: microRNA-mediated regulation of microRNA machinery controls cell fate decisions
Source: eLife journal article supplement (doi:10.7554/elife.72289), 2021-10-01
Supplement: fig1-data1 [file Fig1_Fig_Supplement1A_source_data.xlsx]

## Sheet: Sheet1
Ago1	Ago2	Ago3	Ago4
20.3	11.7	1	0.5
Ago1	Ago2	Ago3	Ago4
63.3	28.2	2.1	0.3
