# Supplementary material for: microRNA-mediated regulation of microRNA machinery controls cell fate decisions
Source: eLife journal article supplement (doi:10.7554/elife.72289), 2021-10-01
Supplement: fig1-data1 [file Fig1_Fig_supplement2_source_data_.xlsx]

## Sheet: miRNA
	CE14_Ago2	CE14_Vim	CE14	C4477_Ago2	C4477_Vim	C4477
	25.4695	26.8008	27.3822	26.8039	27.0953	27.0726
	25.671	26.8033	27.4098	26.6414	27.1206	27.1442
	25.6975	26.9367	27.3729	26.6375	27.018	27.9655
			27.3883			27.3941
	24.0407	25.8364	26.0667	25.789	25.8912	26.0399
	23.9484	25.8086	26.0983	25.8518	25.8734	26.15
	24.1253	25.8892	26.2016	25.9172	25.8813	26.0381
			26.1222			26.076
	CE14_Ago2	CE14_Vim	CE14	C4477_Ago2	C4477_Vim	C4477
	-1.91877	-0.587492	-0.00609823	-0.590174	-0.298775	-0.321456
	-1.71727	-0.585008	0.021509	-0.75267	-0.273534	-0.249943
	-1.69073	-0.451592	-0.0154107	-0.756639	-0.37613	0.571399
	-2.08144	-0.285807	-0.0554794	-0.287001	-0.184786	-0.0360922
	-2.17374	-0.313563	-0.0239034	-0.224202	-0.202607	0.0739923
	-1.99687	-0.23295	0.0793829	-0.158798	-0.194692	-0.0379001
	CE14_Ago2	CE14_Vim	CE14	C4477_Ago2	C4477_Vim	C4477
	3.781	1.50263	1.00424	1.50543	1.2301	1.24959
	3.28813	1.50005	0.985202	1.68491	1.20877	1.18916
	3.22819	1.36755	1.01074	1.68955	1.29786	0.672964
	4.2323	1.21909	1.0392	1.2201	1.13665	1.02533
	4.51192	1.24277	1.01671	1.16813	1.15078	0.950005
	3.99133	1.17524	0.946462	1.11636	1.14448	1.02662

## Sheet: mRNA
		CE14_Ago2	CE14_Vim	CE14	C4477_Ago2	C4477_Vim	C4477
	Ago2	28.8146	32.3078	32.397	28.8682	31.847	32.1062
	Ago2	28.8078	31.5002	32.5692	28.8451	31.5209	32.2373
	Ago2	28.9912	31.3706	32.5981	28.7671	31.5338	32.6871
				32.5214			32.3435
	Vim	27.8539	23.6005	27.7385	27.2566	23.2734	27.4974
	Vim	27.8752	23.7189	27.7451	27.3021	23.0841	27.5712
	vim	27.9986	23.6001	27.7558	27.3909	23.0953	27.4953
				27.7465			27.5213
	Gapdh	27.2943	27.442	27.2959	27.1986	27.2156	27.2492
	Gapdh	27.2952	27.3807	27.2571	27.1021	27.1511	27.3473
	Gapdh	27.2057	27.3668	27.2857	27.0514	27.1043	27.1187
				27.2796			27.2384
	Relative to beads
		CE14_Ago2	CE14_Vim	CE14	C4477_Ago2	C4477_Vim	C4477
	Ago2	-3.7068	-0.213695	-0.124402	-3.47538	-0.496534	-0.237308
	Ago2	-3.71366	-1.02124	0.047722	-3.49849	-0.822689	-0.106254
	Ago2	-3.5302	-1.15085	0.0766803	-3.57649	-0.809716	0.343562
	Vim	0.107392	-4.14591	-0.00798198	-0.264702	-4.24786	-0.0238782
	Vim	0.128713	-4.02761	-0.00140554	-0.219163	-4.43719	0.0498777
	vim	0.252143	-4.14638	0.00938752	-0.130375	-4.42598	-0.0259995
	Gapdh	0.0147281	0.162391	0.0163652	-0.0397641	-0.0228424	0.010829
	Gapdh	0.0156228	0.101092	-0.0224858	-0.136325	-0.0872945	0.108864
	Gapdh	-0.0739014	0.0872138	0.00612059	-0.187003	-0.134163	-0.119693
	Fold
		CE14_Ago2	CE14_Vim	CE14	C4477_Ago2	C4477_Vim	C4477
	Ago2	13.0575	1.15965	1.09006	11.1223	1.41082	1.17879
	Ago2	13.1196	2.02966	0.967463	11.3019	1.7687	1.07643
	Ago2	11.553	2.22045	0.948237	11.9298	1.75287	0.788093
	Vim	0.928264	17.7029	1.00555	1.20139	18.9991	1.01669
	Vim	0.914647	16.3092	1.00097	1.16406	21.6634	0.966018
	vim	0.839648	17.7087	0.993514	1.09458	21.4957	1.01818
	Gapdh	0.989843	0.893543	0.988721	1.02795	1.01596	0.992522
	Gapdh	0.98923	0.932327	1.01571	1.0991	1.06238	0.927318
	Gapdh	1.05256	0.941339	0.995767	1.1384	1.09746	1.0865
