# Supplementary material for: microRNA-mediated regulation of microRNA machinery controls cell fate decisions
Source: eLife journal article supplement (doi:10.7554/elife.72289), 2021-10-01
Supplement: fig1-data1 [file Fig1B_source_data_.xlsx]

## Sheet: Sheet1
	Undifferentiated (%)
2i+Lif	90.5263	90.7216	91.1765	92.3809
Lif	33.8583	28.5714	33.3333	33.0709
-Lif 2days, +Lif	8.88889	6.36364	9.09091	11.0169
