# Supplementary material for: microRNA-mediated regulation of microRNA machinery controls cell fate decisions
Source: eLife journal article supplement (doi:10.7554/elife.72289), 2021-10-01
Supplement: fig1-data1 [file Fig1E_source_data.xlsx]

## Sheet: Sheet1
miRNA	start	end	TPM
miR-182-5p	222	229	71578.3
miR-183-5p	652	658	58834.3
miR-323-3p	821	827	3864.53
miR-200c-3p	854	861	1524.4
miR-200c-3p	4453	4460	1524.4
miR-376b-3p	298	305	665.893
miR-200b-3p	854	861	638.966
miR-200b-3p	4453	4460	638.966
miR-143-3p	4112	4118	578.063
miR-429-3p	854	861	535.725
miR-429-3p	4453	4460	535.725
miR-152-3p	4319	4326	412.818
miR-152-3p	1248	1255	412.818
miR-340-5p	3660	3666	405.013
miR-322-5p	1591	1597	286.732
miR-151-3p	705	712	262.009
miR-151-3p	295	301	262.009
miR-98-5p	5177	5183	257.255
miR-96-5p	223	229	202.002
