# Supplementary material for: microRNA-mediated regulation of microRNA machinery controls cell fate decisions
Source: eLife journal article supplement (doi:10.7554/elife.72289), 2021-10-01
Supplement: fig2-data1 [file Fig2_Fig_Supplement1B_source_data.xlsx]

## Sheet: Sheet1
				E14-vector	E14-1039	E14-1040	4477-vector	4477-1039	4477-1040
			U6	13.7333	13.7926	13.6466	14.6977	13.5697	13.7902
			U6	13.969	14.0509	14.0237	15.073	14.0212	13.7132
			U6	13.6517	13.9099	13.738	14.9111	13.7475	13.974
			U6_average	13.7847	13.9178	13.8028	14.8939	13.7795	13.8258		relative to U6								relative to vector								relative fold change
												E14-vector	E14-1039	E14-1040	4477-vector	4477-1039	4477-1040			E14-vector	E14-1039	E14-1040	4477-vector	4477-1039	4477-1040			E14-vector	E14-1039	E14-1040	4477-vector	4477-1039	4477-1040
			miR-182	24.538	18.8325	24.0035	26.0589	19.133	24.2208		miR-182	10.7534	4.91469	10.2008	11.165	5.35355	10.395		miR-182	-0.0544322	-5.89312	-0.607026	0.38709	-5.42435	-0.382935		miR-182	1.03845	59.43	1.52312	0.76467	42.9431	1.30399
			miR-182	24.8187	18.7527	23.7738	25.0052	17.9358	24.7992		miR-182	11.034	4.83493	9.971	10.1112	4.15634	10.9734		miR-182	0.226242	-5.97288	-0.836809	-0.666663	-6.62156	0.195508		miR-182	0.854859	62.8081	1.7861	1.5874	98.4665	0.873265
			miR-182	24.4207	18.744	23.9202	25.9514	19.0699	24.3018		miR-182	10.636	4.82624	10.1174	11.0575	5.29044	10.476		miR-182	-0.17181	-5.98156	-0.690356	0.279573	-5.48746	-0.301895		miR-182	1.12647	63.1874	1.61368	0.823835	44.8633	1.23276
												10.8078			10.7779
			miR-183	22.8266	21.7554	16.8133	23.8905	22.5567	17.2451		miR-183	9.04193	7.83763	3.01052	8.99655	8.77725	3.4193		miR-183	0.223218	-0.981084	-5.8082	-0.558658	-0.777957	-6.13591		miR-183	0.856653	1.97395	56.0327	1.4729	1.7147	70.3222
			miR-183	22.4012	21.735	16.5441	25.7092	24.0687	17.9677		miR-183	8.61652	7.8172	2.74136	10.8153	10.2893	4.14191		miR-183	-0.202194	-1.00152	-6.07735	1.26005	0.734051	-5.4133		miR-183	1.15045	2.00211	67.5252	0.417531	0.601213	42.6153
			miR-183	22.5824	21.376	16.3701	23.7477	21.3163	16.9789		miR-183	8.79769	7.45821	2.56737	8.85382	7.53681	3.15314		miR-183	-0.0210241	-1.36051	-6.25135	-0.701388	-2.0184	-6.40207		miR-183	1.01468	2.56775	76.1805	1.62607	4.05133	84.5699
												8.81872			9.55521
