# Supplementary material for: microRNA-mediated regulation of microRNA machinery controls cell fate decisions
Source: eLife journal article supplement (doi:10.7554/elife.72289), 2021-10-01
Supplement: fig2-data1 [file Fig2A_source_data.xlsx]

## Sheet: Sheet1
							normalized to U6							Relative to E14							Fold Change
	E14	Ago2_3UTR_mutant	miR182KO	miR183KO	182_183KO			E14	Ago2_3UTR_mutant	miR182KO	miR183KO	182_183KO			E14	Ago2_3UTR_mutant	miR182KO	miR183KO	182_183KO			E14	Ago2_3UTR_mutant	miR182KO	miR183KO	182_183KO
miR182	25.0658	24.7473	31.7724	25.6093	32.6567		miR182	11.0656	10.8446	17.6837	11.5725	18.1996		miR182	-0.0174755	-0.238407	6.60064	0.489447	7.11651		miR182	1.01219	1.17969	0.0103041	0.712298	0.00720638
miR182	25.24	24.9322	32.0132	25.7065	32.6755		miR182	11.2398	11.0295	17.9245	11.6697	18.2184		miR182	0.156743	-0.0534977	6.84145	0.586689	7.13533		miR182	0.897048	1.03778	0.00872002	0.665869	0.00711299
miR182	24.944	24.6846	31.7147	25.443	32.6689		miR182	10.9438	10.7819	17.626	11.4062	18.2118		miR182	-0.139268	-0.30113	6.54292	0.323147	7.12872		miR182	1.10135	1.23211	0.0107247	0.799324	0.00714566
								11.083
miR183	22.7122	22.3014	22.9946	27.6943	29.5133		miR183	8.71202	8.39873	8.90593	13.6576	15.0561		miR183	0.0248776	-0.288414	0.218787	4.97041	6.36896		miR183	0.982904	1.2213	0.859288	0.0318976	0.012099
miR183	22.7521	22.3869	23.0459	27.8332	29.4318		miR183	8.75184	8.48428	8.95721	13.7964	14.9746		miR183	0.0646918	-0.202866	0.270064	5.10925	6.28747		miR183	0.95615	1.15098	0.829283	0.0289709	0.0128022
miR183	22.5978	22.2978	22.8626	27.5619	29.3419		miR183	8.59758	8.39511	8.77389	13.5251	14.8847		miR183	-0.0895694	-0.292037	0.0867464	4.83795	6.1976		miR183	1.06405	1.22437	0.941644	0.034965	0.013625
								8.68714
U6	14.0628	14.0504	14.1216	14.0069	14.4913
U6	14.0108	13.8783	14.1023	14.0714	14.4415
U6	13.9271	13.7793	14.0422	14.032	14.4387
average	14.0002	13.9027	14.0887	14.0368	14.4572
