# Supplementary material for: microRNA-mediated regulation of microRNA machinery controls cell fate decisions
Source: eLife journal article supplement (doi:10.7554/elife.72289), 2021-10-01
Supplement: fig2-data1 [file Fig2C_source_data_.xlsx]

## Sheet: Sheet1
WT	miR182_KO	miR183_KO	miR182/miR183_KO
33.3333	8.16327	15.5556	2.15054
31.0924	3.33333	18.3206	4.80769
30	9.67742	22.449	7.6087
