# Supplementary material for: microRNA-mediated regulation of microRNA machinery controls cell fate decisions
Source: eLife journal article supplement (doi:10.7554/elife.72289), 2021-10-01
Supplement: fig2-data1 [file Fig2D_source_data_.xlsx]

## Sheet: Sheet1
WT	182_KO	183_KO	182_183_KO
28	0	3.125	0
29.5454	0	5.55556	0
28.7234	0	0	0
