# Supplementary material for: microRNA-mediated regulation of microRNA machinery controls cell fate decisions
Source: eLife journal article supplement (doi:10.7554/elife.72289), 2021-10-01
Supplement: fig3-data1 [file Fig3E_source_data.xlsx]

## Sheet: Sheet1
E14	3UTR_mutant
28	14.2857
29.1262	14.0845
26.4151	11.8421
