# Supplementary material for: microRNA-mediated regulation of microRNA machinery controls cell fate decisions
Source: eLife journal article supplement (doi:10.7554/elife.72289), 2021-10-01
Supplement: fig4-data1 [file Fig4A_source_data.xlsx]

## Sheet: miRNA
	E14	4477		normalize to U6				relative to E14				fold
U6	14.3539	14.6939
					E14	4477			E14	4477			E14	4477
let-7a	24.5532	23.6114		let-7a	10.1993	8.91759		let-7a	0.0266275	-1.2551		let-7a	0.981713	2.38684
let-7a	24.5208	23.7444		let-7a	10.1669	9.05054		let-7a	-0.00581406	-1.12215		let-7a	1.00404	2.17671
let-7a	24.5058	23.6505		let-7a	10.1519	8.95662		let-7a	-0.0208134	-1.21608		let-7a	1.01453	2.32315
					10.1727
let-7b	26.8977	26.5266		let-7b	12.5439	11.8327		let-7b	-0.123041	-0.834176		let-7b	1.08903	1.78284
let-7b	27.1309	26.8007		let-7b	12.777	12.1068		let-7b	0.110095	-0.560069		let-7b	0.926527	1.47434
let-7b	27.0337	26.8572		let-7b	12.6798	12.1633		let-7b	0.012946	-0.503571		let-7b	0.991067	1.41772
					12.6669
let-7c	26.1556	25.4739		let-7c	11.8017	10.7801		let-7c	-0.0915781	-1.11318		let-7c	1.06554	2.16322
let-7c	26.4112	25.3977		let-7c	12.0573	10.7039		let-7c	0.1641	-1.18938		let-7c	0.892485	2.28055
let-7c	26.1746	25.2664		let-7c	11.8207	10.5725		let-7c	-0.0725221	-1.3207		let-7c	1.05155	2.49787
					11.8932
let-7d	27.154	26.236		let-7d	12.8001	11.5421		let-7d	-0.12034	-1.37827		let-7d	1.08699	2.59956
let-7d	27.2786	26.3578		let-7d	12.9247	11.664		let-7d	0.00431795	-1.25642		let-7d	0.997011	2.38903
let-7d	27.3903	26.4543		let-7d	13.0364	11.7604		let-7d	0.116023	-1.16		let-7d	0.922728	2.23457
					12.9204
let-7e	24.6344	23.7456		let-7e	10.2805	9.05172		let-7e	-0.00436772	-1.2332		let-7e	1.00303	2.35088
let-7e	24.6689	23.7181		let-7e	10.315	9.0242		let-7e	0.030129	-1.26071		let-7e	0.979333	2.39614
let-7e	24.6131	23.8084		let-7e	10.2592	9.11451		let-7e	-0.0257613	-1.1704		let-7e	1.01802	2.25074
					10.2849
let-7f	25.4421	24.5611		let-7f	11.0882	9.86725		let-7f	-0.0712536	-1.2922		let-7f	1.05063	2.44902
let-7f	25.5086	24.6433		let-7f	11.1547	9.94946		let-7f	-0.0047772	-1.20999		let-7f	1.00332	2.31336
let-7f	25.5894	24.7432		let-7f	11.2355	10.0493		let-7f	0.0760308	-1.11014		let-7f	0.948664	2.15867
					11.1595
let-7g	25.6324	24.7723		let-7g	11.2785	10.0784		let-7g	0.0423901	-1.1577		let-7g	0.971045	2.23102
let-7g	25.6435	24.7713		let-7g	11.2896	10.0774		let-7g	0.0534278	-1.1587		let-7g	0.963644	2.23257
let-7g	25.4942	24.8102		let-7g	11.1403	10.1164		let-7g	-0.0958179	-1.11976		let-7g	1.06867	2.1731
					11.2361
let-7i	27.309	26.7137		let-7i	12.9551	12.0199		let-7i	-0.0889619	-1.02419		let-7i	1.0636	2.03382
let-7i	27.4108	26.793		let-7i	13.0569	12.0992		let-7i	0.0128564	-0.944889		let-7i	0.991128	1.92504
let-7i	27.4741	26.7354		let-7i	13.1202	12.0415		let-7i	0.0761055	-1.00254		let-7i	0.948615	2.00352
					13.0441
miR-98	29.4209	28.2149		miR-98	15.067	13.5211		miR-98	0.00341537	-1.54257		miR-98	0.997635	2.91312
miR-98	29.4728	28.3468		miR-98	15.1189	13.653		miR-98	0.0552212	-1.41064		miR-98	0.962447	2.65855
miR-98	29.3589	28.3735		miR-98	15.005	13.6796		miR-98	-0.0586366	-1.38403		miR-98	1.04148	2.60996
					15.0636
miR-290a	19.9055	20.4121		miR-290a	5.55155	5.71821		miR-290a	-0.0532765	0.113375		miR-290a	1.03762	0.924423
miR-290a	20.0048	20.4523		miR-290a	5.65085	5.7584		miR-290a	0.0460219	0.15357		miR-290a	0.968603	0.899023
miR-290a	19.966	20.5874		miR-290a	5.61209	5.89356		miR-290a	0.00725457	0.288734		miR-290a	0.994984	0.81862
					5.60483
miR-291	18.8472	19.1425		miR-291	4.4933	4.44868		miR-291	0.0408261	-0.00378849		miR-291	0.972098	1.00263
miR-291	18.7499	19.2404		miR-291	4.39602	4.54655		miR-291	-0.0564447	0.0940824		miR-291	1.0399	0.936868
miR-291	18.822	19.3852		miR-291	4.46809	4.69131		miR-291	0.0156186	0.238839		miR-291	0.989232	0.847427
					4.45247
miR-293	19.2843	19.6823		miR-293	4.93038	4.98846		miR-293	0.0756086	0.133695		miR-293	0.948942	0.911494
miR-293	19.1679	19.7227		miR-293	4.81403	5.02885		miR-293	-0.0407378	0.174079		miR-293	1.02864	0.886333
miR-293	19.1738	19.6757		miR-293	4.8199	4.98184		miR-293	-0.0348709	0.127066		miR-293	1.02447	0.915692
					4.85477
miR-30a	22.9055	23.564		miR-30a	8.55157	8.8702		miR-30a	-0.0374159	0.281211		miR-30a	1.02627	0.8229
miR-30a	22.984	23.5329		miR-30a	8.63011	8.83902		miR-30a	0.0411212	0.250033		miR-30a	0.971899	0.840877
miR-30a	22.9392	23.4777		miR-30a	8.58528	8.78388		miR-30a	-0.00370532	0.194895		miR-30a	1.00257	0.873636
					8.58898
miR-16	20.834	21.4174		miR-16	6.48013	6.72353		miR-16	0.0194473	0.26284		miR-16	0.986611	0.833445
miR-16	20.8354	21.4419		miR-16	6.48146	6.74808		miR-16	0.0207708	0.287393		miR-16	0.985706	0.819381
miR-16	20.7744	21.3141		miR-16	6.42047	6.62023		miR-16	-0.0402182	0.159538		miR-16	1.02827	0.895312
					6.46069

## Sheet: pri-miRNA
	E14	4477
18S	13.8217	13.7138
18S	14.0472	14.1145
18S	13.9716	13.7308		normalize to 18S
18S_average	13.9468	13.853						relative to E14				Fold
					E14	4477			E14	4477			E14	4477
pri-let-7d	35.6266	35.1182		pri-let-7d	21.6798	21.2652		pri-let-7d	-0.0407748	-0.455377		pri-let-7d	1.02867	1.37114
pri-let-7d	35.572	35.495		pri-let-7d	21.6252	21.6419		pri-let-7d	-0.0953866	-0.0786279		pri-let-7d	1.06835	1.05601
pri-let-7d	35.8036	35.4222		pri-let-7d	21.8567	21.5691		pri-let-7d	0.136161	-0.151444		pri-let-7d	0.909937	1.11068
					21.7206
pri-let-7e	36.2314	35.9228		pri-let-7e	22.2846	22.0698		pri-let-7e	0.0426736	-0.172139		pri-let-7e	0.970854	1.12673
pri-let-7e	36.1925	36.38		pri-let-7e	22.2456	22.527		pri-let-7e	0.00373799	0.285093		pri-let-7e	0.997412	0.820689
pri-let-7e	36.1423	35.9305		pri-let-7e	22.1955	22.0775		pri-let-7e	-0.0464116	-0.16441		pri-let-7e	1.03269	1.12071
					22.2419
pri-let-7g	34.5672	34.4375		pri-let-7g	20.6203	20.5844		pri-let-7g	-0.230551	-0.266465		pri-let-7g	1.17328	1.20286
pri-let-7g	34.9644	34.5849		pri-let-7g	21.0176	20.7319		pri-let-7g	0.166699	-0.118985		pri-let-7g	0.890879	1.08597
pri-let-7g	34.8616	34.7433		pri-let-7g	20.9147	20.8903		pri-let-7g	0.0638521	0.0393762		pri-let-7g	0.956706	0.973076
					20.8509
pri-let-7f2-98	33.4453	33.3937		pri-let-7f2-98	19.4985	19.5407		pri-let-7f2-98	-0.187328	-0.145098		pri-let-7f2-98	1.13865	1.10581
pri-let-7f2-98	33.7215	33.539		pri-let-7f2-98	19.7747	19.6859		pri-let-7f2-98	0.0888532	0.000117894		pri-let-7f2-98	0.94027	0.999918
pri-let-7f2-98	33.7311	33.3869		pri-let-7f2-98	19.7843	19.5338		pri-let-7f2-98	0.0984752	-0.151978		pri-let-7f2-98	0.93402	1.11109
					19.6858

## Sheet: pre-miRNA
	E14	4477
U6	14.3539	14.2482		normalize to U6								Fold
					E14	4477			E14	4477			E14	4477
pre-let-7d	29.0279	28.9377		pre-let-7d	14.674	14.6895		pre-let-7d	0.103056	0.118604		pre-let-7d	0.931058	0.921078
pre-let-7d	28.8892	29.1013		pre-let-7d	14.5353	14.8532		pre-let-7d	-0.0355767	0.282259		pre-let-7d	1.02497	0.822302
pre-let-7d	28.8573	29.1095		pre-let-7d	14.5034	14.8613		pre-let-7d	-0.0674796	0.29039		pre-let-7d	1.04788	0.817681
					14.5709
pre-let-7e	28.5014	28.4396		pre-let-7e	14.1475	14.1914		pre-let-7e	-0.110079	-0.0661859		pre-let-7e	1.07929	1.04695
pre-let-7e	28.5658	28.4954		pre-let-7e	14.2119	14.2472		pre-let-7e	-0.0457038	-0.0103919		pre-let-7e	1.03219	1.00723
pre-let-7e	28.7673	28.3889		pre-let-7e	14.4134	14.1407		pre-let-7e	0.155783	-0.11685		pre-let-7e	0.897645	1.08436
					14.2576
pre-let-7g	22.5891	22.5601		pre-let-7g	8.23523	8.3119		pre-let-7g	-0.133373	-0.0567044		pre-let-7g	1.09686	1.04009
pre-let-7g	22.7002	22.752		pre-let-7g	8.34629	8.50386		pre-let-7g	-0.022307	0.135259		pre-let-7g	1.01558	0.910506
pre-let-7g	22.8782	22.776		pre-let-7g	8.52428	8.52778		pre-let-7g	0.15568	0.159181		pre-let-7g	0.897709	0.895534
					8.3686
pre-let-7i	26.5878	26.4909		pre-let-7i	12.2339	12.2428		pre-let-7i	-0.145563	-0.136664		pre-let-7i	1.10616	1.09936
pre-let-7i	26.7649	26.5892		pre-let-7i	12.411	12.3411		pre-let-7i	0.0315407	-0.0383771		pre-let-7i	0.978375	1.02696
pre-let-7i	26.8474	26.5485		pre-let-7i	12.4935	12.3004		pre-let-7i	0.114022	-0.0790642		pre-let-7i	0.924008	1.05633
					12.3794
pre-miR-98	29.6218	29.2067		pre-miR-98	15.2679	14.9585		pre-miR-98	0.123166	-0.186239		pre-miR-98	0.91817	1.13779
pre-miR-98	29.4627	29.3123		pre-miR-98	15.1088	15.0641		pre-miR-98	-0.0359288	-0.0805883		pre-miR-98	1.02522	1.05745
pre-miR-98	29.4114	29.2905		pre-miR-98	15.0575	15.0423		pre-miR-98	-0.0872373	-0.102424		pre-miR-98	1.06233	1.07358
					15.1447
