# Supplementary material for: microRNA-mediated regulation of microRNA machinery controls cell fate decisions
Source: eLife journal article supplement (doi:10.7554/elife.72289), 2021-10-01
Supplement: fig4-data1 [file Fig4B_source_data.xlsx]

## Sheet: Sheet1
LNA Control
E14	27.5862	28.125	27.9279
3'UTR_Mutant	16.9811	21.7742	17.9688
LNA-let7
E14	32.8	38.2353	34.9315
3'UTR_Mutant	32.0611	37.3016	38.6364
