# Supplementary material for: microRNA-mediated regulation of microRNA machinery controls cell fate decisions
Source: eLife journal article supplement (doi:10.7554/elife.72289), 2021-10-01
Supplement: fig5-data1 [file Figure5CD_source_data.xlsx]

## Sheet: Colony_formation
	E14	3'UTR_mutnat	double_mutant
	32.5758	17.1429	7.29167
	29.9213	23.2759	9.41177
	33.8346	18.2609	8.69565
	29.7101	16.9231
	29.452	16.1765
	28.0992	15.8333

## Sheet: Exit_Pluripotency
	E14	3'UTR_mutnat	double_mutant
	29.5652	18.75	9.78261
	27.6191	15.7895	5.47945
	30.2521	18.4	11.7021
	25.2101	17.4312
	28	17.9775
	28.7129	19.1304
