# Supplementary material for: microRNA-mediated regulation of microRNA machinery controls cell fate decisions
Source: eLife. 2021 Oct 1;10:e72289. doi: 10.7554/eLife.72289 (PMC8504967; doi:10.7554/eLife.72289)
Supplement: Figure 5—source data 1. — An Excel file of numbers for Figure 5C and D. [file elife-72289-fig5-data1.zip]

Archive with 22 entries (20 files):
- Figure5/
- Figure5/Figure5B_source_data_Gapdh.tif
- __MACOSX/Figure5/._Figure5B_source_data_Gapdh.tif
- Figure5/Figure5_Figure_supplement1_source_data.tif
- __MACOSX/Figure5/._Figure5_Figure_supplement1_source_data.tif
- Figure5/Figure5A_source_data_Ago2.tif
- __MACOSX/Figure5/._Figure5A_source_data_Ago2.tif
- Figure5/Figure5CD_source_data.xlsx
- __MACOSX/Figure5/._Figure5CD_source_data.xlsx
- Figure5/Figure5B_source_data_Ago2.tif
- __MACOSX/Figure5/._Figure5B_source_data_Ago2.tif
- Figure5/Figure5A_source_data_Gapdh.tif
- __MACOSX/Figure5/._Figure5A_source_data_Gapdh.tif
- Figure5/Uncropped_Figures/
- Figure5/Figure5A_source_data_FLAG.tif
- __MACOSX/Figure5/._Figure5A_source_data_FLAG.tif
- Figure5/Uncropped_Figures/Figure5_Figure_supplement1_uncropped.pdf
- __MACOSX/Figure5/Uncropped_Figures/._Figure5_Figure_supplement1_uncropped.pdf
- Figure5/Uncropped_Figures/Figure5B_uncropped.pdf
- __MACOSX/Figure5/Uncropped_Figures/._Figure5B_uncropped.pdf
- Figure5/Uncropped_Figures/Figure5A_uncropped.pdf
- __MACOSX/Figure5/Uncropped_Figures/._Figure5A_uncropped.pdf
