# Supplementary material for: microRNA-mediated regulation of microRNA machinery controls cell fate decisions
Source: eLife. 2021 Oct 1;10:e72289. doi: 10.7554/eLife.72289 (PMC8504967; doi:10.7554/eLife.72289)
Supplement: Supplementary file 1. [file elife-72289-supp1.xlsx]

## Sheet: oligoes
Reagent type (species) or resource	Designation	Source or reference	Identifiers	Additional information
Sequence-based reagent	AGCGGGTGGTAGTAGCCCTC	This paper	oWH4503	sgRNA for N-terminus FLAG tagging of mouse Ago1
Sequence-based reagent	CTGGCCCCATCCTTAGATACCATTTTTGGCCTCACTCCATCTATCTCTCCAGGGCAGAGAGAAAGGTAGAAACTTTTACAAGGTCAGTCTTACTATTGGCCCAAGAACAGAGCTGGCATTAAAGCCCTGGTGTCCTGCCTTCCAGGCCAGGGCTCCTCCGTGCCCAGGATGCCTCACAGGGTGGGGGCCTGTGCCCGAGGGACCAGTTCTCTGCCTGTCCCTGCCAGGTACACCCCTGTGGGCCGCTCCTTCTTCTCACCGCCTGAGGACTACAAAGACCATGACGGTGATTATAAAGATCATGACATCGATTACAAGGATGACGATGACAAGGGCTACTACCACCCGCTGGGGGGTGGGCGCGAGGTCTGGTTCGGCTTTCACCAGTCTGTGCGCCCT…	This paper	oWH4505	donor gblock for N-terminus FLAG knockin to the mouse Ago1
Sequence-based reagent	CTGGCCCCATCCTTAGATACCATTTTT	This paper	oWH4506	forward genotyping primer for N-terminus FLAG-tagging of mouse Ago1
Sequence-based reagent	CTCAGATTCTTTCAGAAAAAAATAAATGAAGGCA	This paper	oWH4507	reverse genotyping primer for N-terminus FLAG-tagging of mouse Ago1
Sequence-based reagent	GTGATCGGCAGGTTCCGGCA	This paper	oWH4469	sgRNA1 for knocking out mouse MiR182
Sequence-based reagent	CTACCATTGCCAAAAATGGT	This paper	oWH4470	sgRNA2 for knocking out mouse MiR182
Sequence-based reagent	GGGCGCAGGGAAACATTAAGGGTC	This paper	oWH4471	forward genotyping primer for knocking out mouse MiR182
Sequence-based reagent	GGGCTTGAGGAGGTTTTACACTGGA	This paper	oWH4472	reverse genotyping primer for knocking out mouse MiR182
Sequence-based reagent	GAGGAGCTCCAAGGTGCTCG	This paper	oWH4473	sgRNA1 for knockout mouse MiR183
Sequence-based reagent	ATTCTACCAGTGCCATACAC	This paper	oWH4474	sgRNA2 for knockout mouse MiR183
Sequence-based reagent	AAGGAGCAGAGGAGGTCTTTGTACC	This paper	oWH4475	forward genotyping primer for mouse MiR183 knockout
Sequence-based reagent	CCTAGGTTATGAGGATCTGGCAACT	This paper	oWH4476	reverse genotyping primer for mouse MiR183 knockout
Sequence-based reagent	AATAAATGTCACAGTCCTAC	This paper	oWH4477	sgRNA1 for mutating mouse miR-183 and miR-182 sites on mouse Ago2 3’UTR
Sequence-based reagent	CAGTGAGCAGCTTATAGGTT	This paper	oWH4478	sgRNA2 for mutating mouse miR-183 and miR-182 sites on mouse Ago2 3’UTR
Sequence-based reagent	AATAAATGTCACAGTCCTACTGGTCCAGAGGTACAGGCTACACAGTCCACACTGGGGGTGGGGAGGGAGGAGGGGGCATCGCTGGTACATGAAGCCAGTTGCATATTCCTCTACTTAAGCACTAAAAGCCACAAGAGGTGGACTGTCTCCAGGCTCCACACAGCTCCTGATATGTGAAGCAGGTCACAAGAAGCGCCCCTCGTCAACGAAAGGGAAACAGCATCTACCTACCACATTAATACTGCAAACCAGATACATATATTCTTCTCTTACATTAAAGACATTAACAGTGAAAAAGGATTGTACTGTATTTATCACCACAGACCCGTATTCTTTAGAAACTTTGGAAAATAAATGTCACAGTCCTACATGACAAATCTTATGATTAGACTGTCAGTA…	This paper	oWH4479	donor gblock for making mutations of miR-183 and miR-182 sites on mouse Ago2 3’UTR
Sequence-based reagent	AGCTCCTGATATGTGAAGCAGGTCACAAG	This paper	oWH4480	forward genotyping primer for making mutations of miR-183 and miR-182 sites on mouse Ago2 3’UTR
Sequence-based reagent	GCAGCGCTGAAGGAAGCCATACCTCT	This paper	oWH4481	reverse genotyping primer for making mutations of miR-183 and miR-182 sites on mouse Ago2 3’UTR
Sequence-based reagent	GTAACCCGTTGAACCCCATT	This paper	oWH145	forward qPCR primer for mouse 18S rRNA
Sequence-based reagent	ccatccaatcggtagtagcg	This paper	oWH146	reverse qPCR primer for mouse 18S rRNA
Sequence-based reagent	tggtaaagatgaggcaaatgtgtgg	This paper	oWH4822	forward qPCR primer for mouse pri-let-7g
Sequence-based reagent	acaaactactacctcagcctgga	This paper	oWH4823	reverse qPCR primer for mouse pri-let-7g
Sequence-based reagent	ACCCAAGGCAGAAAGGAAACGTA	This paper	oWH4834	forward qPCR primer for mouse pri-let-7d
Sequence-based reagent	TGCCAAGTAGAAGACCAGCAAGA	This paper	oWH4835	reverse qPCR primer for mouse pri-let-7d
Sequence-based reagent	TAGTTGAGGAAGACACCCGAGGA	This paper	oWH4830	forward qPCR primer for mouse pri-let-7e
Sequence-based reagent	TGTGAACAGAGAAGACACCCCAG	This paper	oWH4831	reverse qPCR primer for mouse pri-let-7e
Sequence-based reagent	atccaactagccctgttcaagttcc	This paper	oWH4852	forward qPCR primer for mouse pri-miR-98
Sequence-based reagent	actgccaccaggtgttctaatgaag	This paper	oWH4853	reverse qPCR primer for mouse pri-miR-98
Sequence-based reagent	TTAGGGCAGAGATTTTGCCCACA	This paper	oWH5242	qPCR primer for mouse pre-let-7d
Sequence-based reagent	GAGGAAGACACCCGAGGAGATCA	This paper	oWH5243	qPCR primer for mouse pre-let-7e
Sequence-based reagent	TGAGGGTCTATGATACCACCCGG	This paper	oWH5246	qPCR primer for mouse pre-let-7g
Sequence-based reagent	GGTCGGGTTGTGACATTGCCCGCT	This paper	oWH5247	qPCR primer for mouse pre-let-7i
Sequence-based reagent	GTGGGGTAGGGATTTTAGGCCCCA	This paper	oWH5248	qPCR primer for mouse pre-miR-98
Sequence-based reagent	TTTGGCAATGGTAGAACTCACACCG	PMID: 33599613	oWH4820	qPCR forward primer for mouse mmu-miR-182-5p
Sequence-based reagent	TATGGCACTGGTAGAATTCACT	PMID: 33599613	oWH4821	qPCR forward primer for mouse mmu-miR-183-5p
Sequence-based reagent	TGAGGTAGTAGGTTGTATAGTT	PMID: 33599613	oWH4792	qPCR forward primer for mouse mmulet-7a
Sequence-based reagent	TGAGGTAGTAGGTTGTGTGGTT	PMID: 33599613	oWH4793	qPCR forward primer for mouse mmu-let-7b
Sequence-based reagent	TGAGGTAGTAGGTTGTATGGTT	PMID: 33599613	oWH4794	qPCR forward primer for mouse mmulet-7c
Sequence-based reagent	AGAGGTAGTAGGTTGCATAGTT	PMID: 33599613	oWH4795	qPCR forward primer for mouse mmu-let-7d
Sequence-based reagent	TGAGGTAGGAGGTTGTATAGTT	PMID: 33599613	oWH4796	qPCR forward primer for mouse mmu-let-7e
Sequence-based reagent	TGAGGTAGTAGATTGTATAGTT	PMID: 33599613	oWH4797	qPCR forward primer for mouse mmulet-7f
Sequence-based reagent	TGAGGTAGTAGTTTGTACAGTT	PMID: 33599613	oWH4798	qPCR forward primer for mouse mmu-let-7g
Sequence-based reagent	TGAGGTAGTAGTTTGTGCTGTT	PMID: 33599613	oWH4799	qPCR forward primer for mouse mmu-let-7i
Sequence-based reagent	TGAGGTAGTAAGTTGTATTGTT	PMID: 33599613	oWH4800	qPCR forward primer for mouse mmu-miR-98
Sequence-based reagent	ACTCAAACTATGGGGGCACTTT	PMID: 33599613	oWH4801	qPCR forward primer for mouse mmu-miR-290a
Sequence-based reagent	AGTGCCGCAGAGTTTGTAGTGT	PMID: 33599613	oWH4802	qPCR forward primer for mouse mmu-miR-293
Sequence-based reagent	aaagTgcTTccacTTTgTgTgc	PMID: 33599613	oWH4803	qPCR forward primer for mouse mmu-miR-291
Sequence-based reagent	TGTAAACATCCTCGACTGGAAG	PMID: 33599613	oWH4872	qPCR forward primer for mouse mmu-miR-30a-5p
Sequence-based reagent	TAGCAGCACGTAAATATTGGCG	PMID: 33599613	oWH4873	qPCR forward primer for mouse mmu-miR-16-5p
Sequence-based reagent	CCATCACTGCCTAATGCCCCTACACAGGGACTGTGGGTCGTGGGGAGGGGGGGAGGTGGTCGTGGGGTGGGGGGGAGGTGGCTGGAGGGCAGGCAGGGCTTGAGGAGGTTTTACACTGGAACAGGACCATACAGGCCGAAGGACCATAGTCTGGACCTTGTGTTAACTGTGGGAAGAGCGCCCTCCTAAAACCACCCTAACTGCTTCTTCTTCAGCATAGGCTTACTGGTCTGGCTGCTGGAGGCCTCCCACCATTTTTGGCAATGGTAGAACTCACACCGGTAAGGTAATGGGACCCGGTGGTTCTAGACTTGCCAACTATGGTGTAAGTGCTGAGCTGCTGAAGGTCTGCACCGTGCCGGAACCTGCCGATCACCAGGAAGGAGAGGGGACTCCTGT…	This paper	oWH4509	gblock containing mouse pri-Mir182 for cloning onto Hpa1/BsrG1 cut pWH406
Sequence-based reagent	ATGTGATGGGAAACTCTGCTGCCCTCTGCAAGTCCAAGAAATCAGACTTTCTCCTCACTTGTCCTTGTCTTCTTGAAGGACAATTTGGGCTAGTGCACAACAACGAGCTGGTGAAGAGCTGGTGAGGAGGGTTGCTAAACTGCGGATGACAGCAGTGGGGGTGGGGTGGGGGGAGTAGGTTGTAGGACCTCCAGGAGAAGGCAGCTGACCCCTCTGCAGGGTCTGCAGGCTGGAGAGTGTGACTCCTGTCCTGTGTATGGCACTGGTAGAATTCACTGTGAACAGTCTCAGTCAGTGAATTACCGAAGGGCCATAAACAGAGCAGAGACAGATCCGCGAGCACCTTGGAGCTCCTCACCCCTTTCTGCCTAGACCTCTGTTTCCAGGGGTGCCAGGGTA…	This paper	oWH4510	gblock containing mouse pri-Mir183 for cloning onto Hpa1/BsrG1 cut pWH406
Sequence-based reagent	/5BiotinTEG/ gctttaaaaccccaatggaaat	This paper	oWH5461	anti-sense oligo for Ago2 mRNA in RNA antisense purification
Sequence-based reagent	/5BiotinTEG/ cattagtgacaacttcttaggg	This paper	oWH5462	anti-sense oligo for Ago2 mRNA in RNA antisense purification
Sequence-based reagent	/5BiotinTEG/ atgtgaagcaggtcacaagaag	This paper	oWH5463	anti-sense oligo for Ago2 mRNA in RNA antisense purification
Sequence-based reagent	/5BiotinTEG/ tcagtgcatagatcctatgaaa	This paper	oWH5464	anti-sense oligo for Ago2 mRNA in RNA antisense purification
Sequence-based reagent	/5BiotinTEG/ tgagtgtttttctatcgttttg	This paper	oWH5465	anti-sense oligo for Ago2 mRNA in RNA antisense purification
Sequence-based reagent	/5BiotinTEG/ cttagaaacacgcggttctaag	This paper	oWH5466	anti-sense oligo for Ago2 mRNA in RNA antisense purification
Sequence-based reagent	/5BiotinTEG/ tgatgggtttttaagagtgagt	This paper	oWH5467	anti-sense oligo for Ago2 mRNA in RNA antisense purification
Sequence-based reagent	/5BiotinTEG/ agttttgctagtatcactaagg	This paper	oWH5468	anti-sense oligo for Ago2 mRNA in RNA antisense purification
Sequence-based reagent	/5BiotinTEG/ aaggcaggggaaataatctcta	This paper	oWH5469	anti-sense oligo for Ago2 mRNA in RNA antisense purification
Sequence-based reagent	/5BiotinTEG/ gctaaacagaccatgtacttag	This paper	oWH5470	anti-sense oligo for Ago2 mRNA in RNA antisense purification
Sequence-based reagent	/5BiotinTEG/ gctggaaaaactgcaacaaggg	This paper	oWH5471	anti-sense oligo for Vim mRNA in RNA antisense purification
Sequence-based reagent	/5BiotinTEG/ taacattgagcagatcttggta	This paper	oWH5472	anti-sense oligo for Vim mRNA in RNA antisense purification
Sequence-based reagent	/5BiotinTEG/ cttaatcaggagtgttcttttt	This paper	oWH5473	anti-sense oligo for Vim mRNA in RNA antisense purification
Sequence-based reagent	/5BiotinTEG/ gtgtgcaatttttattcaaggt	This paper	oWH5474	anti-sense oligo for Vim mRNA in RNA antisense purification
Sequence-based reagent	/5BiotinTEG/ cttgaaagctgttttcctaaga	This paper	oWH5475	anti-sense oligo for Vim mRNA in RNA antisense purification
Sequence-based reagent	/5BiotinTEG/ gctcctgaaaaactgcagtaaa	This paper	oWH5476	anti-sense oligo for Vim mRNA in RNA antisense purification
Sequence-based reagent	/5BiotinTEG/ tctttctattccaaatctatct	This paper	oWH5477	anti-sense oligo for Vim mRNA in RNA antisense purification
Sequence-based reagent	/5BiotinTEG/ ttttgtaaaccttttctacgtc	This paper	oWH5478	anti-sense oligo for Vim mRNA in RNA antisense purification
Sequence-based reagent	/5BiotinTEG/ gcacaagatttcttcgtaaact	This paper	oWH5479	anti-sense oligo for Vim mRNA in RNA antisense purification
Sequence-based reagent	/5BiotinTEG/ gaagcagtaacaagttggtcag	This paper	oWH5480	anti-sense oligo for Vim mRNA in RNA antisense purification
