# Supplementary figures and images for: microRNA-mediated regulation of microRNA machinery controls cell fate decisions
Source: eLife journal article supplement (doi:10.7554/elife.72289), 2021-10-01

anti-FLAG

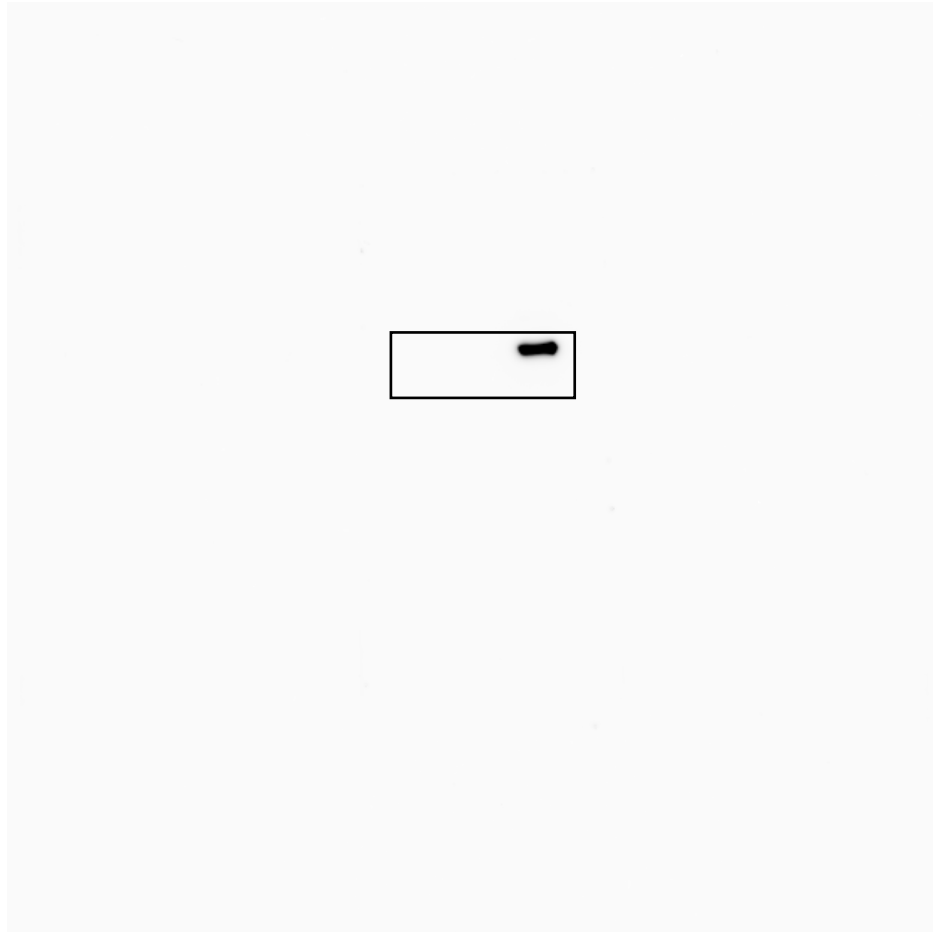

anti-FLAG (long exposure)

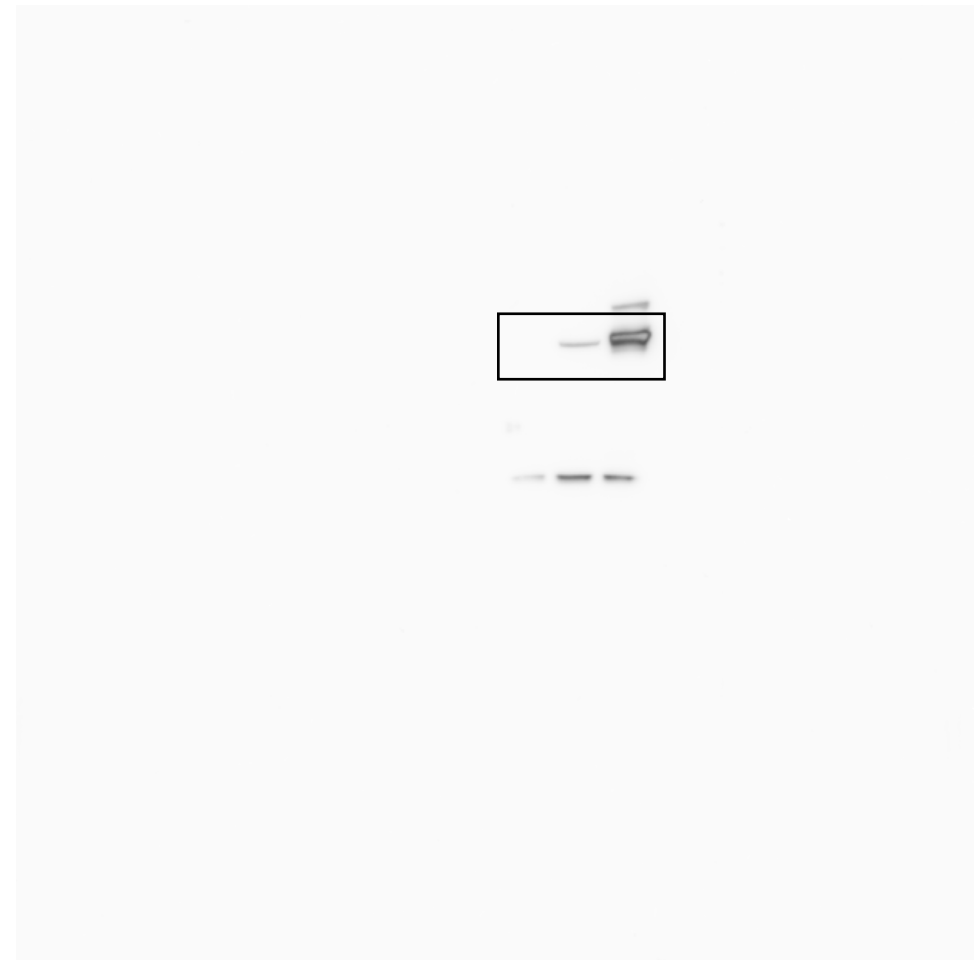

Ago1

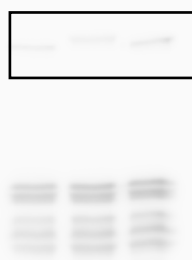

Ago2

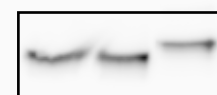

Nanog

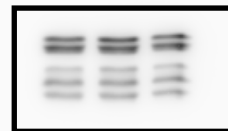

Oct4

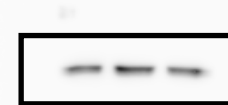

Gapdh

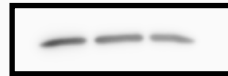

Supplement: fig1-data1 [file elife-72289-fig1-data1-v2.zip]

Ago2

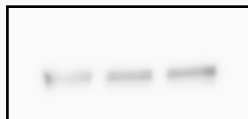

Gapdh

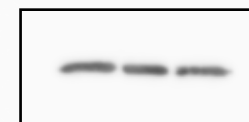

Supplement: fig1-data1 [file elife-72289-fig1-data1-v2.zip]

Ago1 locus

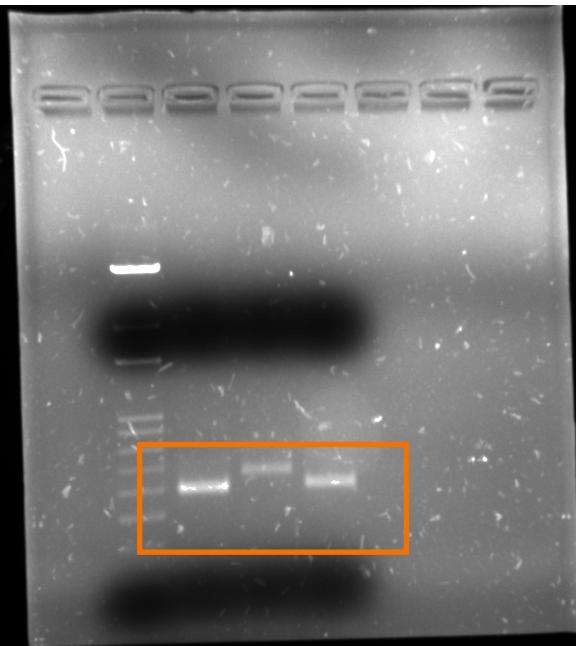

Ago2 locus

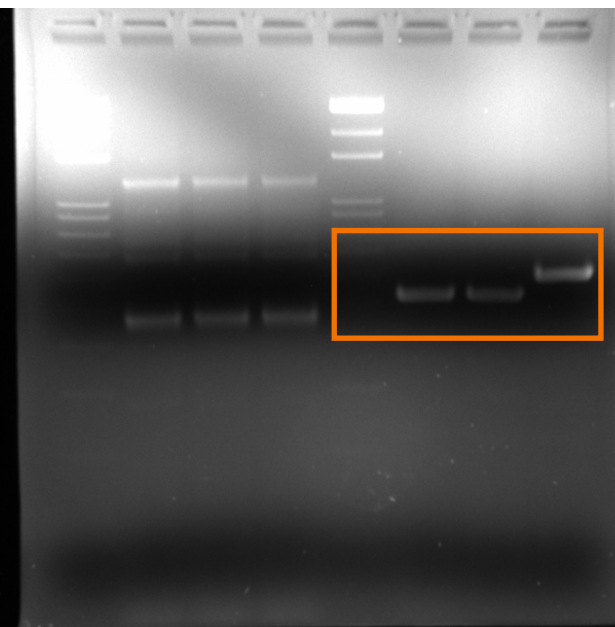

Supplement: fig1-data1 [file elife-72289-fig1-data1-v2.zip]

Ago2

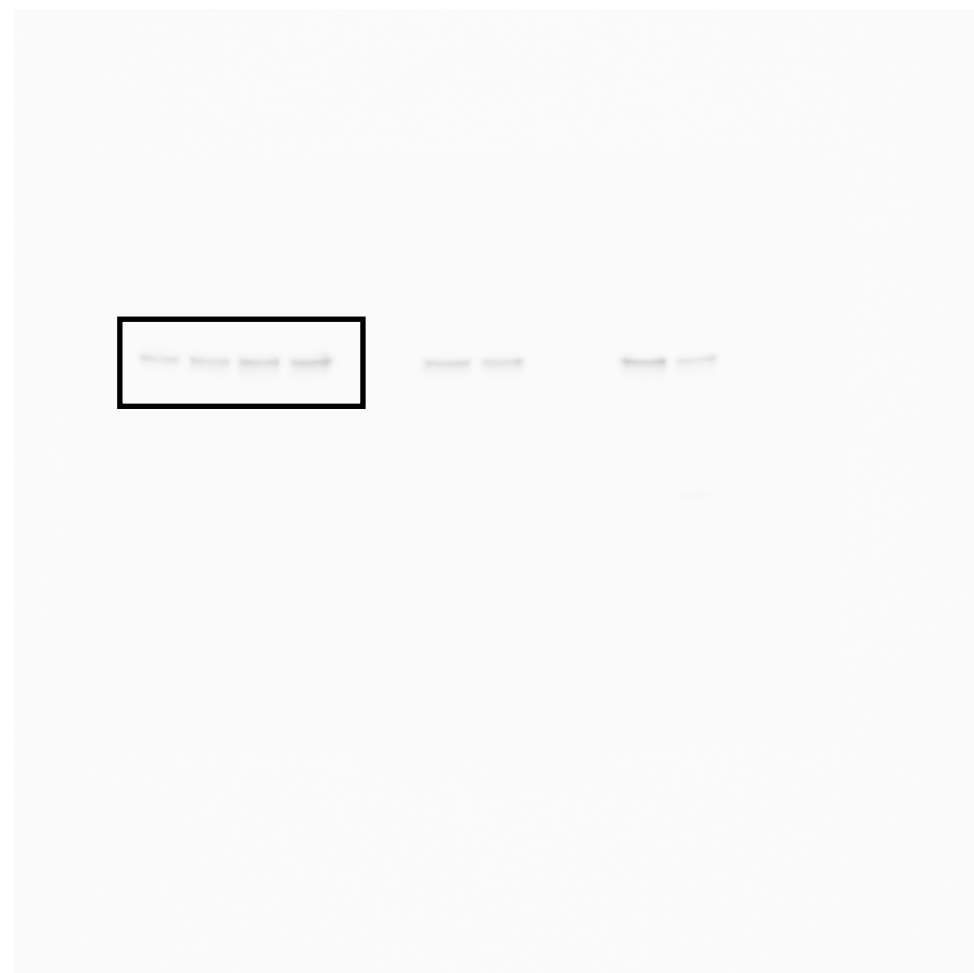

Nanog

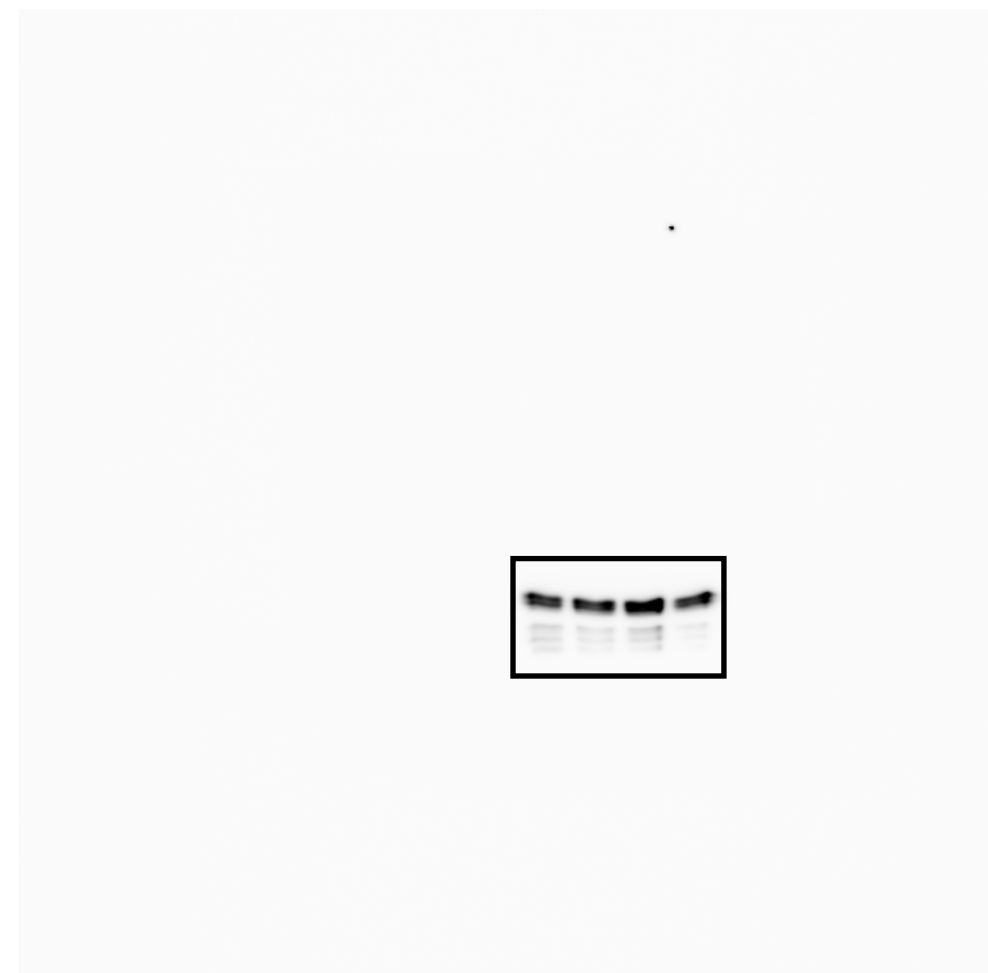

Oct4

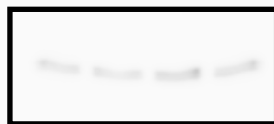

Gapdh

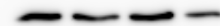

Supplement: fig2-data1 [file Figure2B.pdf › Figure2/uncropped_Figures/Figure2B.pdf]

Nanog

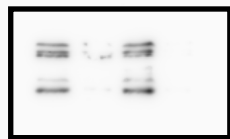

Oct4

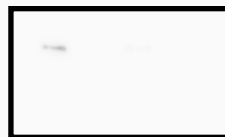

Tubulin

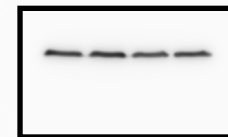

Supplement: fig2-data1 [file Figure2E_uncropped.pdf › Figure2/uncropped_Figures/Figure2E_uncropped.pdf]

Ago2

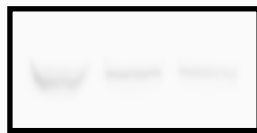

Gapdh

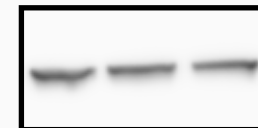

Supplement: fig2-data1 [file Figure2_Figure_supplement1C_uncropped.pdf › Figure2/uncropped_Figures/Figure2_Figure_supplement1C_uncropped.pdf]

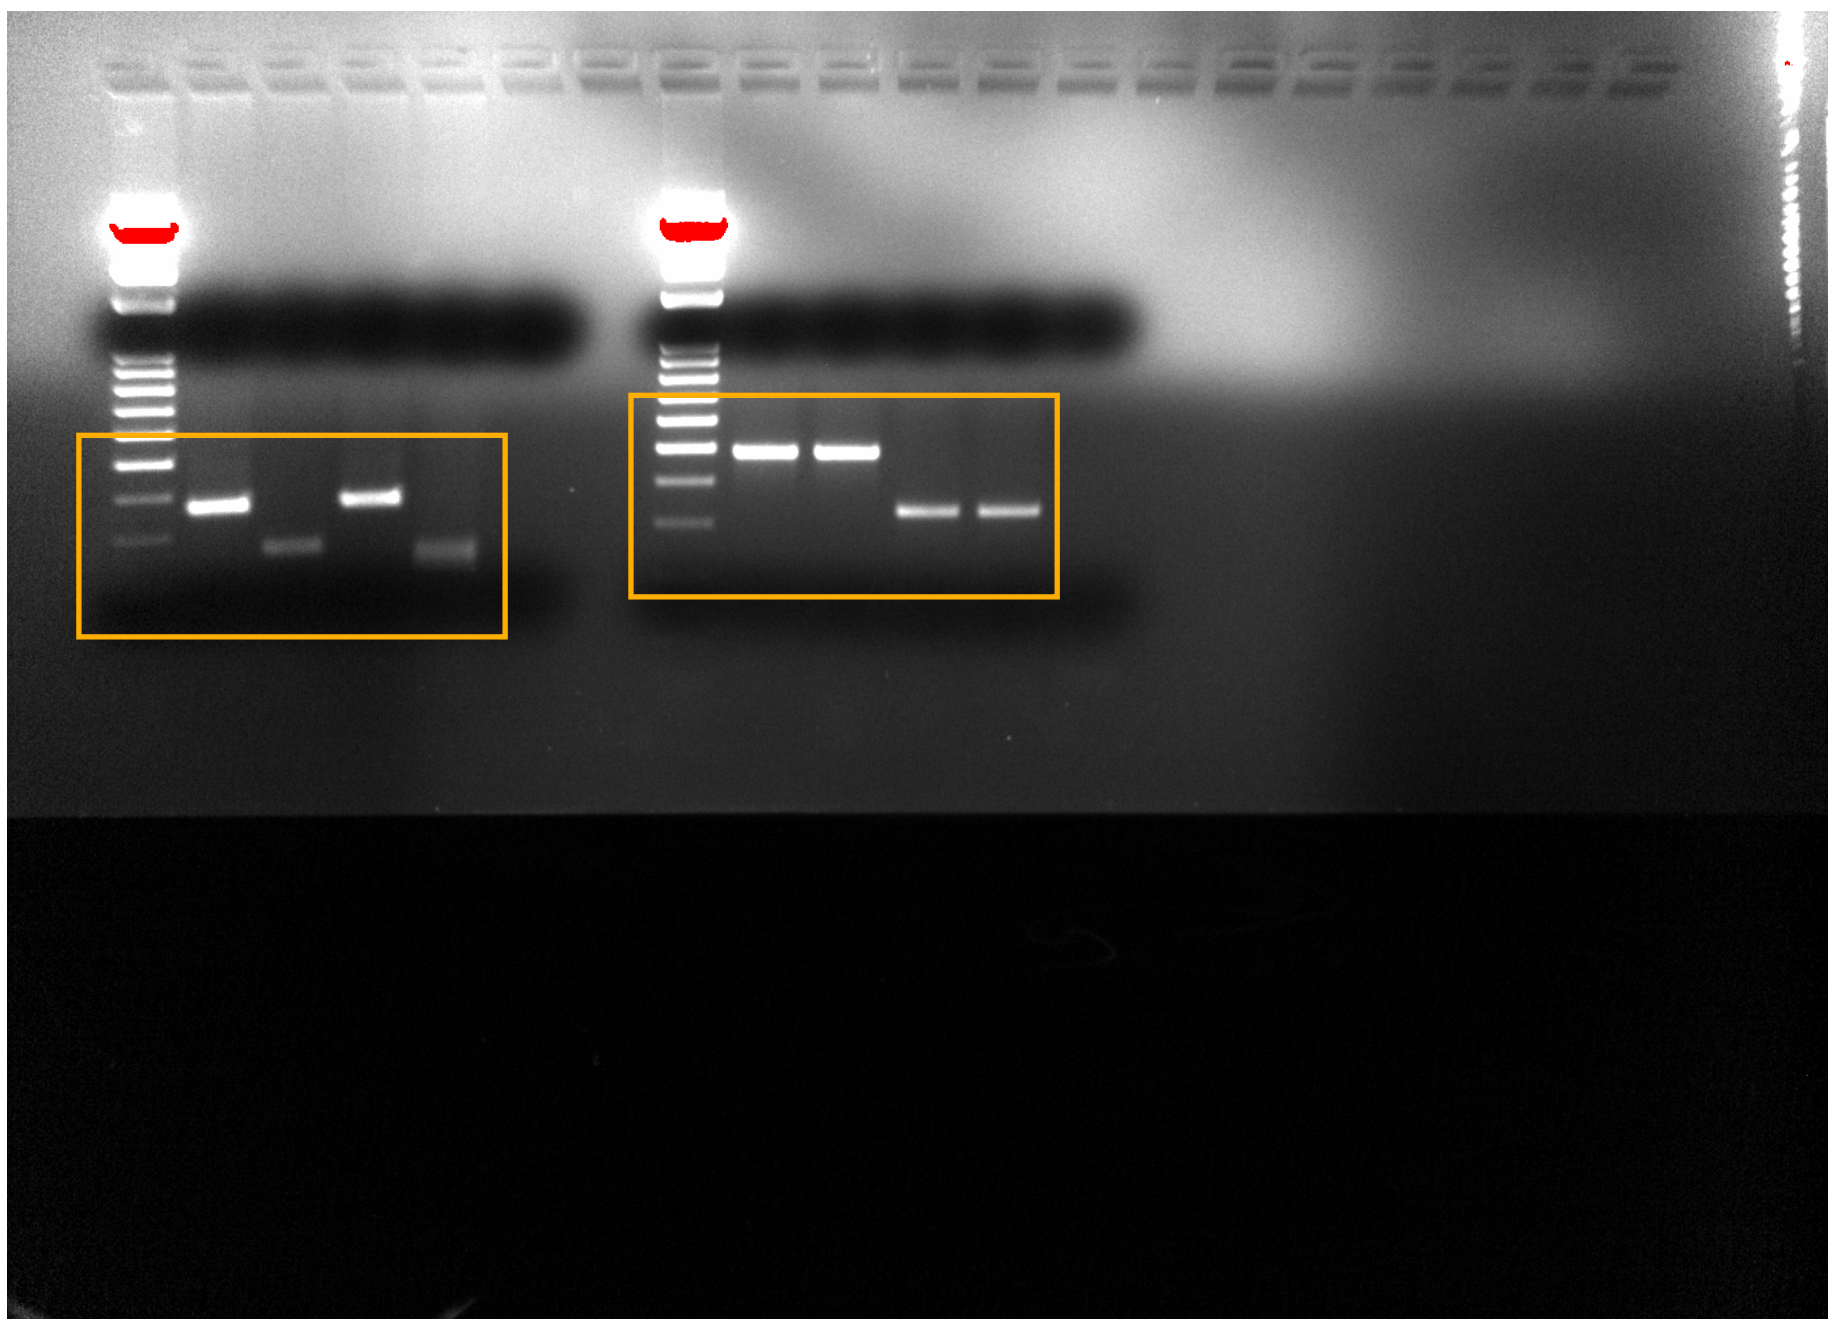

Supplement: fig2-data1 [file Figure2_figure_supplement1A.pdf › Figure2/uncropped_Figures/Figure2_figure_supplement1A.pdf]

Ago2

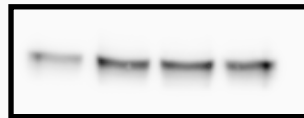

Nanog

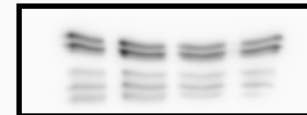

Oct4

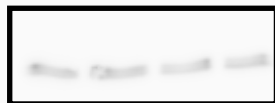

Gapdh

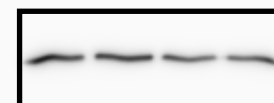

Supplement: fig3-data1 [file elife-72289-fig3-data1-v2.zip]

Ago2

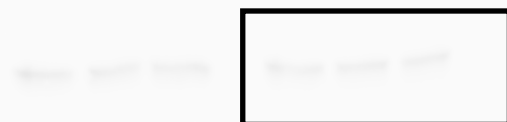

Horizontal flop

Gapdh

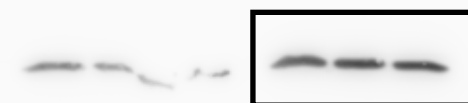

Horizontal flop

Supplement: fig3-data1 [file elife-72289-fig3-data1-v2.zip]

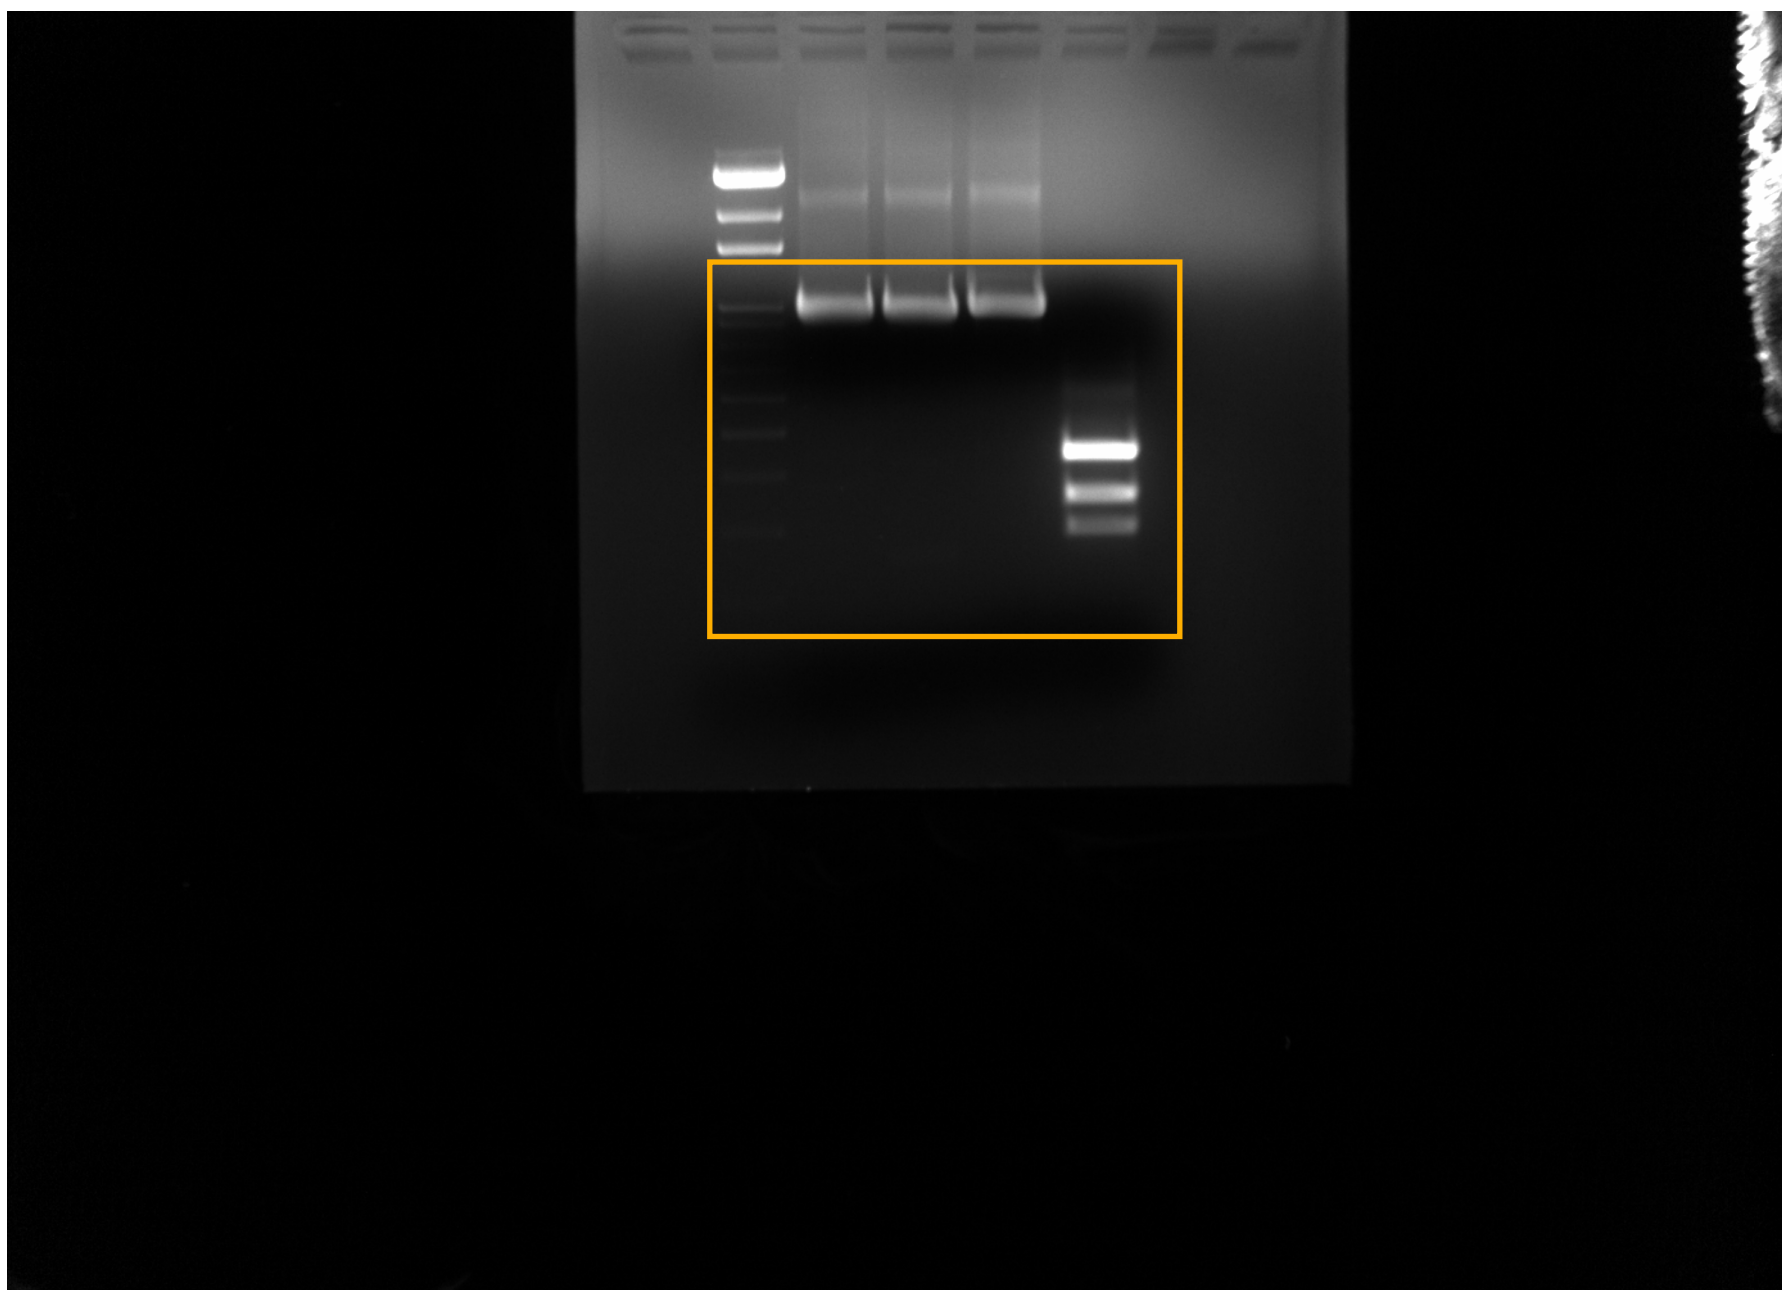

Supplement: fig3-data1 [file elife-72289-fig3-data1-v2.zip]

Nanog

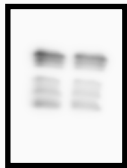

Oct4

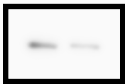

Tubulin

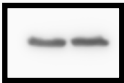

Supplement: fig3-data1 [file elife-72289-fig3-data1-v2.zip]

anti-FLAG

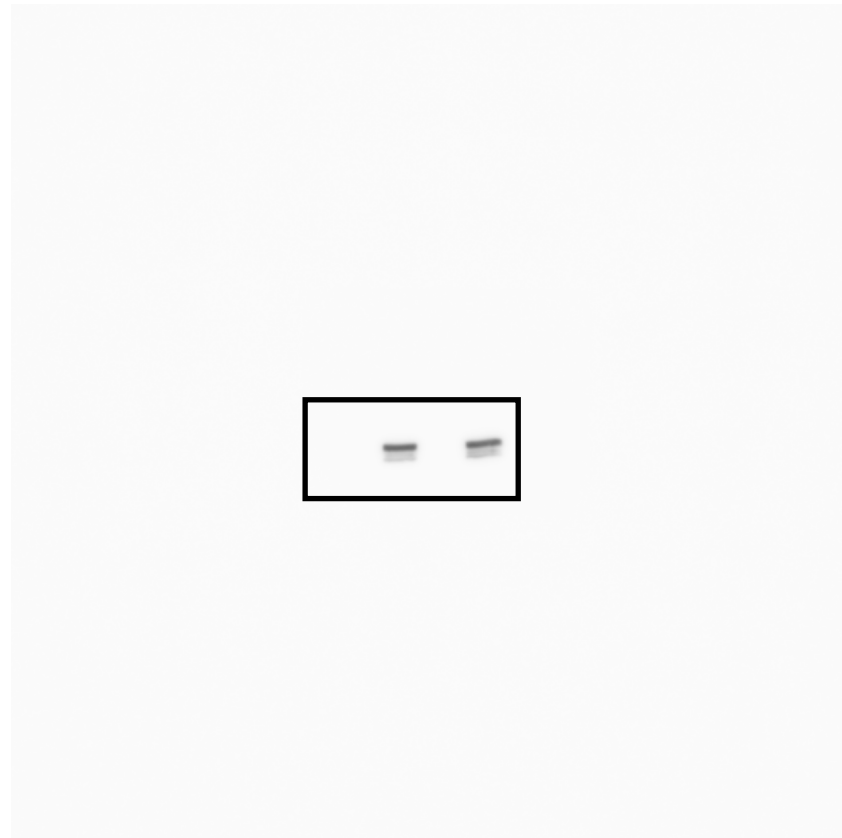

Ago2

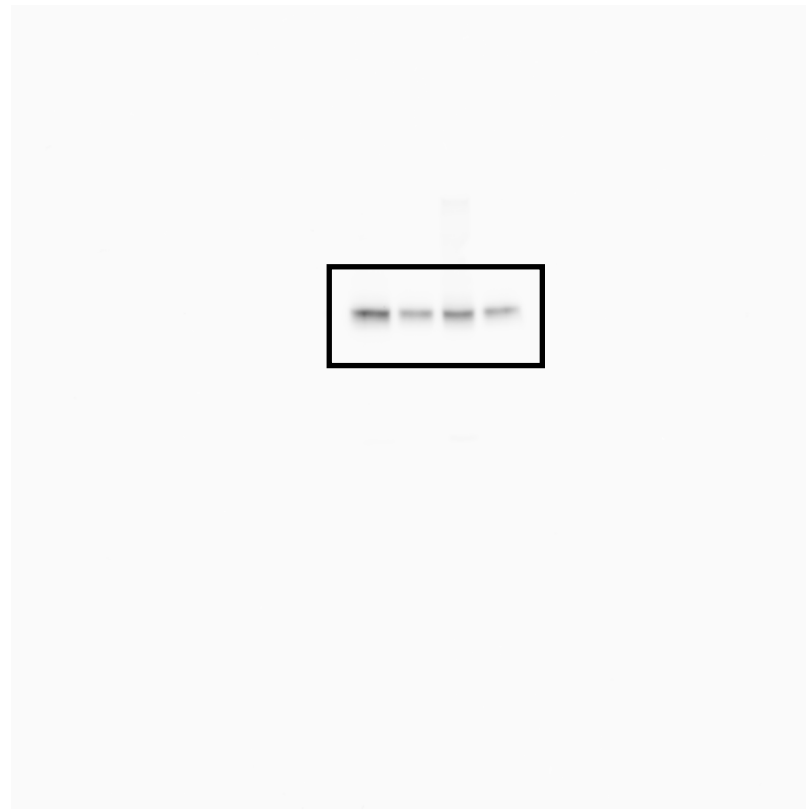

Gapdh

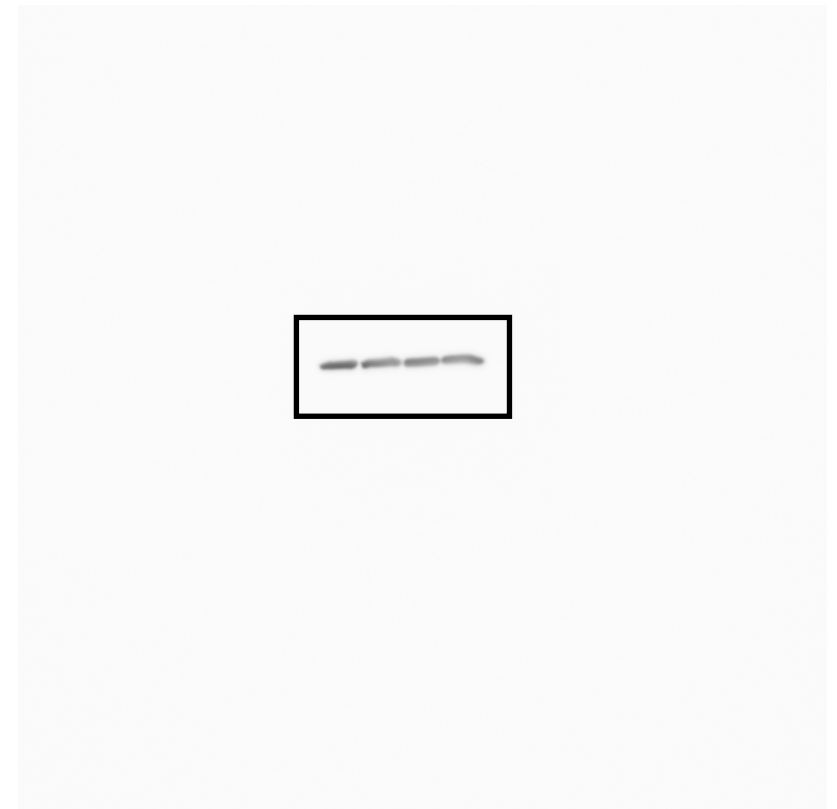

Supplement: fig5-data1 [file elife-72289-fig5-data1-v2.zip]

Figure 5 - Figure supplement 1A

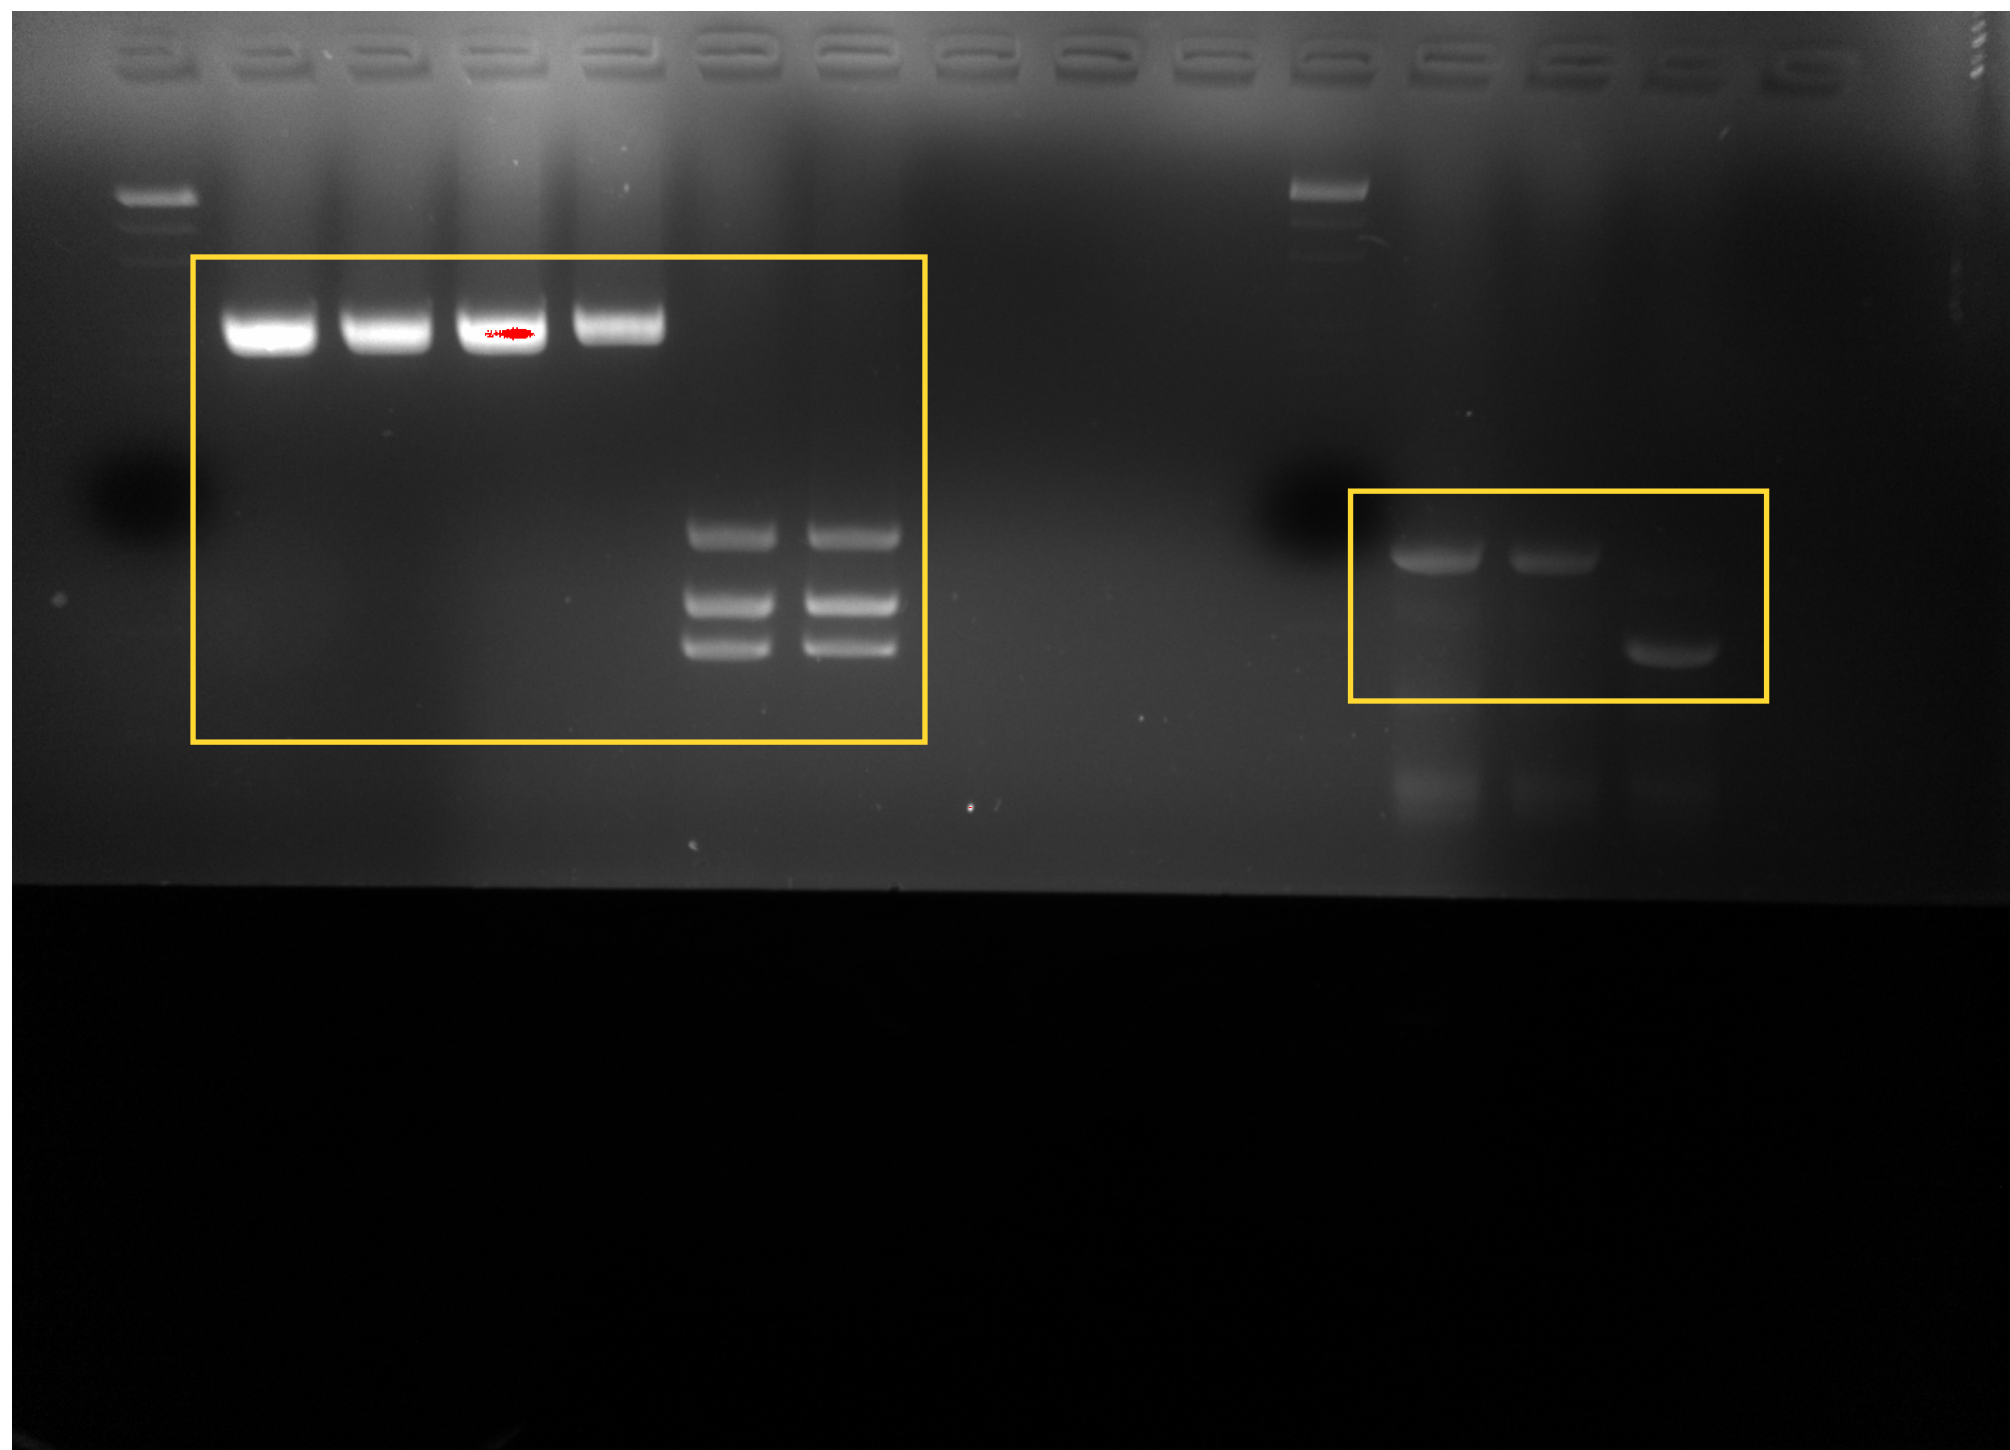

Figure 5 - Figure supplement 1B

Supplement: fig5-data1 [file elife-72289-fig5-data1-v2.zip]

Ago2

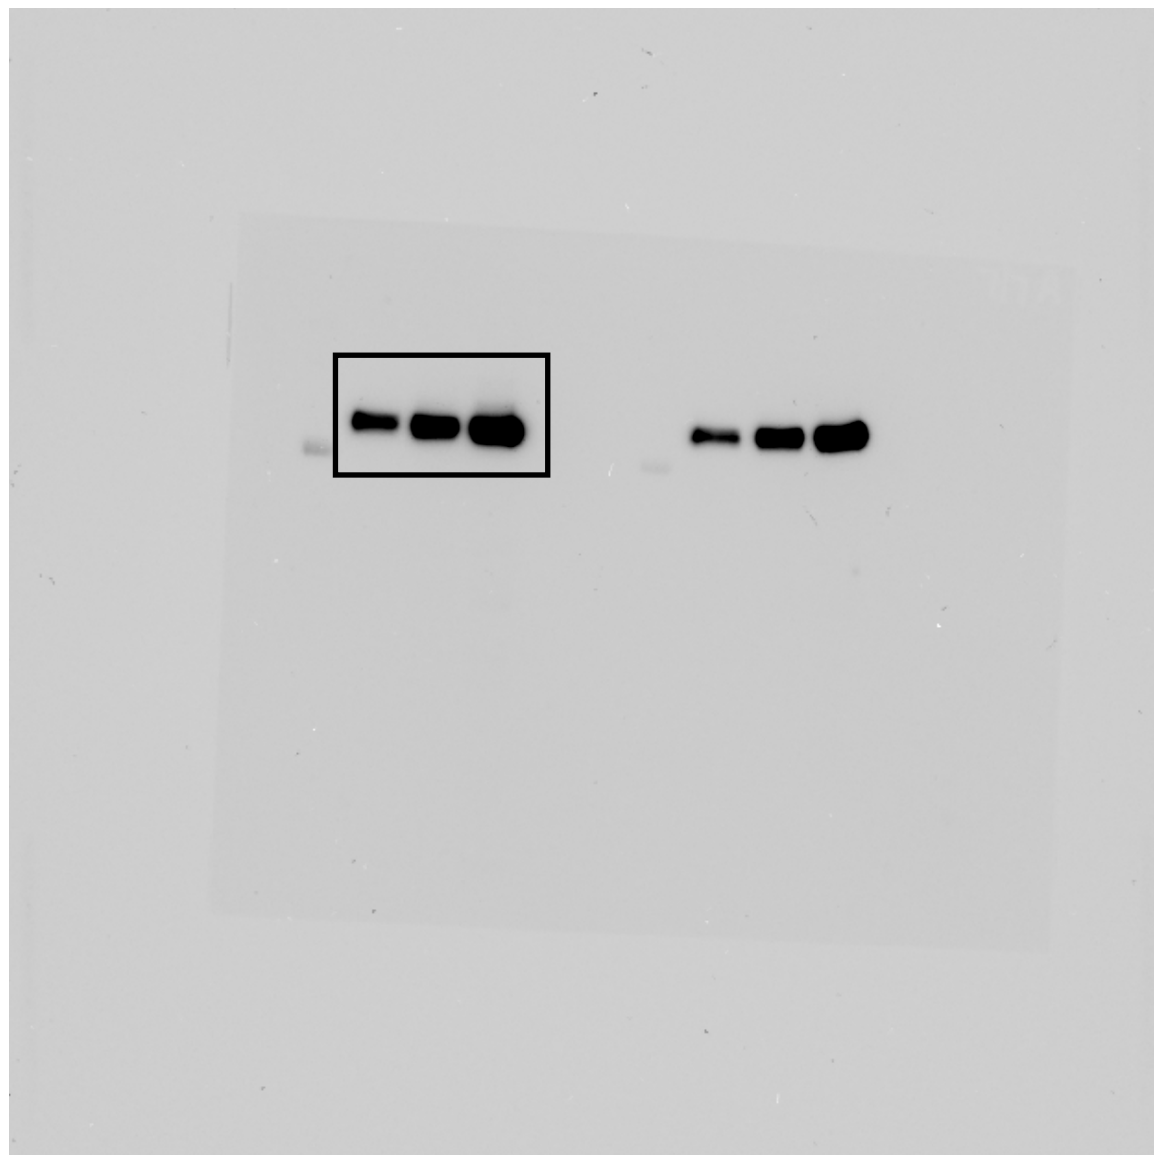

Gapdh

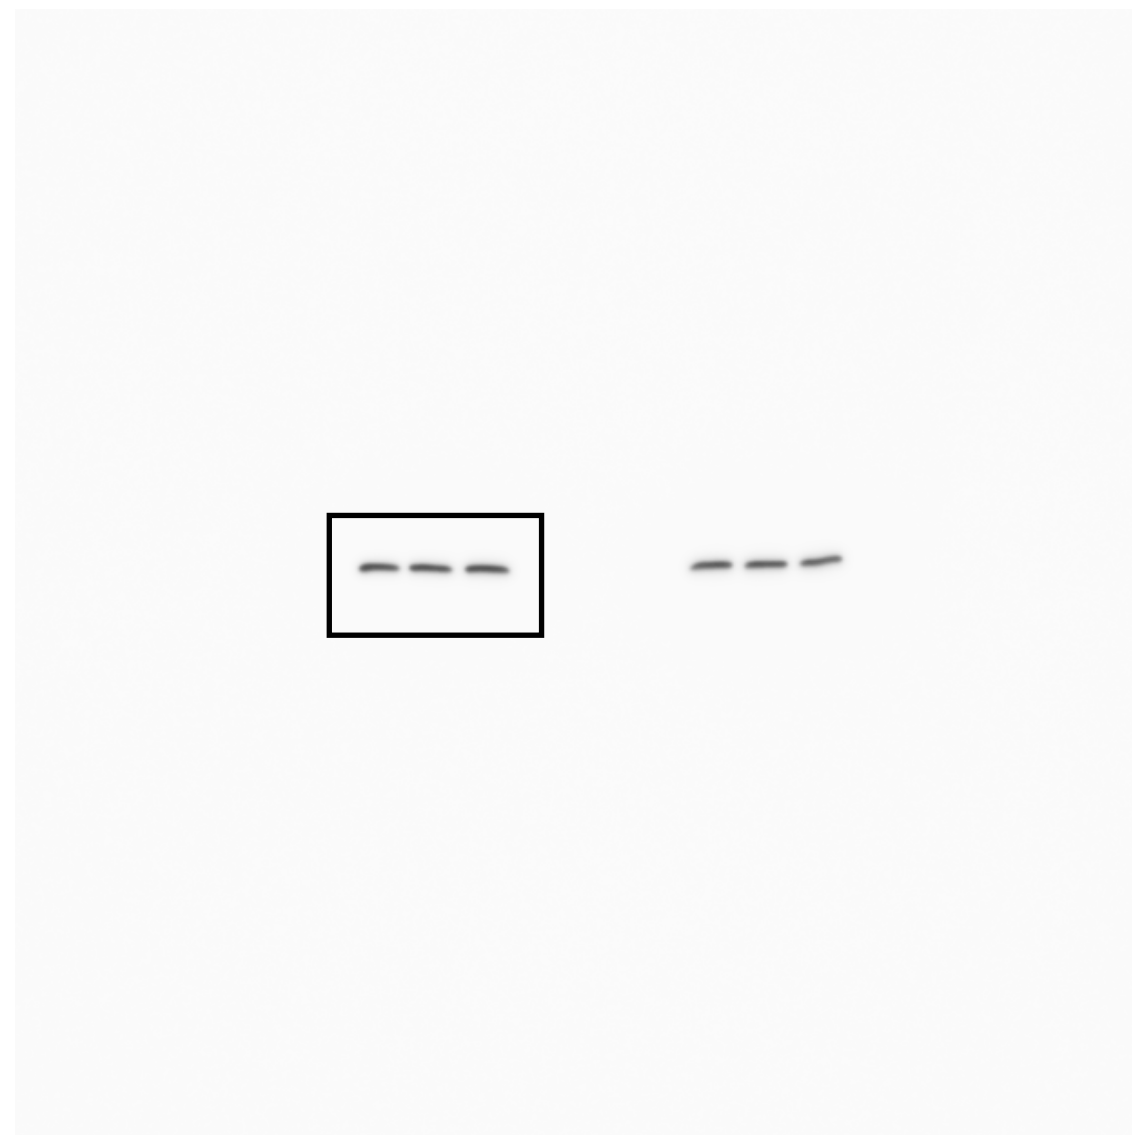

Supplement: fig5-data1 [file elife-72289-fig5-data1-v2.zip]
